# Supplementary material for: Long noncoding RNA LINC01559 promotes pancreatic cancer progression by acting as a competing endogenous RNA of miR-1343-3p to upregulate RAF1 expression
Source: publisher site journal article supplement (doi:10.18632/aging.103487), 2020-07-17
Supplement: Supplementary file [file aging-v12i14-103487-supplementary-material-SD1.pdf]

## SUPPLEMENTARY TABLE

Supplementary Table 1. The primer sequences in this study.

| Gene        |         | Sequence                             |
|-------------|---------|--------------------------------------|
| GAPDH       | Forward | 5'-GGAGCGAGATCCCTCCAAAAT-3'          |
|             | Reverse | 5'-GGCTGTTGTCATACTTCTCATGG-3'        |
| U6          | Forward | 5'-TGCGGGTGCTCGCTTCGGC-3'            |
|             | Reverse | 5'-CCAGTGCAGGGTCCGAGGT-3'            |
| LINC01559   | Forward | 5'-GTCCTGCAGAACTCCCTCTT-3'           |
|             | Reverse | 5'-AGTCCTGGAGCTGCAGAAAT -3'          |
| miR-1343-3p | Forward | 5'-CTAGTGCAGTTGTGACTCTACCCAGGAAA-3'  |
|             | Reverse | 5'-AGCTTTTCCTGGGTAGAGTCACAACCTGCA-3' |
| RAF1        | Forward | 5'-GGGAGCTTGGAAGACGATCAG-3'          |
|             | Reverse | 5'-ACACGGATAGTGTTGCTTGTC-3'          |
